# Supplementary material for: Acceptance and preference for Long-Acting Antiretrovirals among people living with HIV in China
Source: Research Square preprint supplement (doi:10.21203/rs.3.rs-6364693/v1), 2025-05-12
Supplement: Supplementary file 1 [file 6969b88ca8355f1741913af3.docx]

**Supplemental Content**

1. **Your Basic Information**
2. In which city do you reside? ___________
3. What is your year of birth? ___________
4. Your ethnicity:
   - A. Han Chinese
   - B. Other ethnic group
5. Your gender:
   - A. Male
   - B. Female
6. Your marital status:
   - A. Single
   - B. Married ·
   - C. Divorced/Separated ·
   - D. Widowed
7. Your average monthly income:
   - A. 0–1000 RMB
   - B. 1001–2000 RMB
   - C. 2001–3000 RMB
   - D. 3001–4000 RMB
   - E. 4001–5000 RMB
   - F. 5001–10000 RMB
   - G. 10001–20000 RMB
   - H. Above 20000 RMB
8. Your education level:
   - A. Primary school or below
   - B. Middle school
   - C. High school or vocational school
   - D. Associate degree
   - E. Bachelor’s degree or higher
9. How would you describe your current health status?
   - A. Fair
   - B. Good
   - C. Excellent
10. Your alcohol consumption:
    - A. Heavy drinker (≥3 times/week, ≥100ml alcohol per session; equivalent to 2 bottles of beer)
    - B. Light drinker (<3 times/week, <100ml alcohol per session; equivalent to 2 bottles of beer)
    - C. Never drink
    - D. Former drinker (quit)
11. Are you a local resident?
    - A. Yes
    - B. No
12. Have you ever used marijuana, cocaine, heroin, amphetamines (meth), prescription painkillers, ecstasy, or poppers?
    - A. Never used
    - B. Used in the past but not now
    - C. Used within the last 6 months
13. **Your Disease and Treatment Information**
14. Route of infection:
    - A. Intravenous drug use
    - B. Blood transmission (transfusion or blood selling)
    - C. Male homosexual contact
    - D. Heterosexual contact
    - E. Mother-to-child transmission
15. In which year were you diagnosed with HIV? __________
16. Are you currently on treatment?
    - A. Yes
    - B. No
17. In which year did you start treatment? ________
18. Which hospital manages your treatment/follow-up?
    - A. The First Affiliated Hospital of China Medical University
    - B. Other hospital (please specify):
19. Your PID (dependent on hospital selection)
20. What was your most recent HIV viral load? (c/ml) ________
21. Your most recent CD4 count:
    - A. 0–50
    - B. 51–100
    - C. 101–200
    - D. 201–500
    - E. Above 500
22. Are you on a second-line regimen (e.g., Lopinavir/Ritonavir-based)?
    - A. Yes
    - B. No
23. Are you taking self-paid medications?
    - A. Yes
    - B. No
24. Your current medication type:
    - A. Single-tablet regimen (one pill daily)
    - B. Two or more pills daily
25. How many HIV medication pills should you take daily? ________
26. Your daily dosing frequency:
    - A. Once daily
    - B. Twice daily
27. Rate your medication adherence (0–100 points): ________
28. How difficult is it for you to take medication daily?
    - A. Not at all ·
    - B. Slightly difficult ·
    - C. Unsure ·
    - D. Difficult ·
    - E. Very difficult
29. How many doses did you miss in the last 2 weeks? ________
30. How convenient is it to refill prescriptions at the hospital?
    - A. Very convenient ·
    - B. Convenient ·
    - C. Neutral ·
    - D. Inconvenient ·
    - E. Very inconvenient
31. How difficult is it to schedule hospital tests?
    - A. Not at all ·
    - B. Slightly difficult ·
    - C. Unsure ·
    - D. Not difficult ·
    - E. Not at all difficult
32. How many years have you been on treatment?
    - A. ≤1 year
    - B. 1–5 years
    - C. 6–10 years
    - D. >10 years
33. **Long-Acting Medication Preferences**
34. Have you heard of long-acting medications?
    - A. Yes
    - B. No
35. If the following options were equally effective and priced, which would you prefer?
    - A. Daily oral pill
    - B. Intravenous infusion every 1–2 weeks
    - C. Intramuscular injection every 1–2 months
    - D. Implant (similar to a catheter) every 6–12 months
36. A new HIV treatment involves a small plastic implant under your skin that slowly releases medication. How likely would you be to try it?
    - A. Definitely try
    - B. Probably try
    - C. Unsure
    - D. Probably not try
    - E. Definitely not try
37. A new HIV treatment requires injections every 1–2 months instead of daily pills. How likely would you be to try it?
    - A. Definitely try
    - B. Probably try
    - C. Unsure
    - D. Probably not try
    - E. Definitely not try
38. What benefits do you see in long-acting treatments?
    - A. No one would see me taking HIV medication
    - B. No need to carry medication
    - C. No need to remember daily doses
    - D. Fewer hospital visits
    - E. Other (please specify):
39. If clinic visits were required for injections, how likely would you be to try this method?

| **Frequency** | **Definitely try** | **Probably try** | **Unsure** | **Probably not try** | **Definitely not try** |
| --- | --- | --- | --- | --- | --- |
| Weekly |  |  |  |  |  |
| Biweekly |  |  |  |  |  |
| Monthly |  |  |  |  |  |
| Every 2 months |  |  |  |  |  |
| Quarterly |  |  |  |  |  |

1. How concerned are you about the following potential issues with injectable treatments?

| **Issue** | **Very concerned** | **Concerned** | **Unsure** | **Slightly unconcerned** | **Not at all concerned** |
| --- | --- | --- | --- | --- | --- |
| Side effects (e.g., rash, stomach discomfort) |  |  |  |  |  |
| Possible need for multiple injections per session |  |  |  |  |  |
| Swelling/pain at injection site |  |  |  |  |  |
| Longer-lasting side effects than pills |  |  |  |  |  |
| Allergic reactions |  |  |  |  |  |
| Interactions with alcohol/other drugs |  |  |  |  |  |

1. How concerned are you about the following potential issues with implant treatments?

| **Issue** | **Very concerned** | **Concerned** | **Unsure** | **Slightly unconcerned** | **Not at all concerned** |
| --- | --- | --- | --- | --- | --- |
| Side effects (e.g., rash, stomach discomfort) |  |  |  |  |  |
| Potential treatment inefficacy |  |  |  |  |  |
| Swelling/pain at implant site |  |  |  |  |  |
| Longer-lasting side effects than pills |  |  |  |  |  |
| Visibility of the implant |  |  |  |  |  |
| Scarring from long-term implantation |  |  |  |  |  |
